# Supplementary material for: Predischarge Postpartum Methicillin ResistantStaphylococcus aureusInfection and Group B Streptococcus Carriage at the Individual and Hospital Levels
Source: Hindawi journal article supplement (doi:10.1155/2014/515646), 2014-01-01
Supplement: f1 [file 515646.f1.pdf]

**Table S1:** *Odds ratios for the effect of GBS colonization on early postpartum MRSA infection under different values of sensitivity of MRSA documentation*

|                     |     | Sensitivity in GBS+ |     |     |
|---------------------|-----|---------------------|-----|-----|
|                     |     | 10%                 | 20% | 30% |
| Sensitivity in GBS- | 10% | 1.1                 | 0.6 | 0.4 |
|                     | 20% | 2.2                 | 1.1 | 0.7 |
|                     | 30% | 3.3                 | 1.7 | 1.1 |
